# 1 SINATRA: A Sub-Image Analysis Pipeline for Selecting 2 Features that Differentiate Classes of 3D Shapes

3  
4 Bruce Wang<sup>1,\*</sup>, Timothy Sudijono<sup>2,\*</sup>, Henry Kirveslahti<sup>3,\*</sup>, Tingran Gao<sup>4</sup>, Douglas M. Boyer<sup>5</sup>, Sayan  
5 Mukherjee<sup>3,6-8</sup>, and Lorin Crawford<sup>9-11,†</sup>

6 **1 Data Science Initiative, Brown University, Providence, RI, USA**

7 **2 Division of Applied Mathematics, Brown University, Providence, RI, USA**

8 **3 Department of Statistical Science, Duke University, Durham, NC, USA**

9 **4 Committee on Computational and Applied Mathematics, Department of Statistics,  
10 University of Chicago, Chicago, IL, USA**

11 **5 Department of Evolutionary Anthropology, Duke University, Durham, NC, USA**

12 **6 Department of Computer Science, Duke University, Durham, NC, USA**

13 **7 Department of Mathematics, Duke University, Durham, NC, USA**

14 **8 Department of Bioinformatics & Biostatistics, Duke University, Durham, NC, USA**

15 **9 Department of Biostatistics, Brown University, Providence, RI, USA**

16 **10 Center for Statistical Sciences, Brown University, Providence, RI, USA**

17 **11 Center for Computational Molecular Biology, Brown University, Providence, RI, USA**

18 **\* Authors Contributed Equally**

19 **† Corresponding E-mail: [lorin\\_crawford@brown.edu](mailto:lorin_crawford@brown.edu)**

## 20 Abstract

21 It has been a longstanding challenge in geometric morphometrics and medical imaging to infer the physical  
22 locations (or regions) of 3D shapes that are most associated with a given response variable (e.g. class  
23 labels) without needing common predefined landmarks across the shapes, computing correspondence maps  
24 between the shapes, or requiring the shapes to be diffeomorphic to each other. In this paper, we introduce  
25 SINATRA: the first statistical pipeline for sub-image analysis which identifies physical shape features  
26 that explain most of the variation between two classes without the aforementioned requirements. We also  
27 illustrate how the problem of 3D sub-image analysis can be mapped onto the well-studied problem of  
28 variable selection in nonlinear regression models. Here, the key insight is that tools from integral geometry  
29 and differential topology, specifically the Euler characteristic, can be used to transform a 3D mesh  
30 representation of an image or shape into a collection of vectors with minimal loss of geometric information.  
31 Crucially, this transform is invertible. The two central statistical, computational, and mathematical  
32 innovations of our method are: (1) how to perform robust variable selection in the transformed space  
33 of vectors, and (2) how to pullback the most informative features in the transformed space to physical  
34 locations or regions on the original shapes. We highlight the utility, power, and properties of our method  
35 through detailed simulation studies, which themselves are a novel contribution to 3D image analysis.  
36 Finally, we apply SINATRA to a dataset of mandibular molars from four different genera of primates  
37 and demonstrate the ability to identify unique morphological properties that summarize phylogeny.

## 38 Significance

39 The recent curation of large-scale databases with 3D surface scans of shapes has motivated the devel-  
40 opment of tools that better detect global-patterns in morphological variation. Studies which focus on  
41 identifying differences between shapes have been limited to simple pairwise comparisons and rely on  
42 pre-specified landmarks (that are often expert-derived). We present the first statistical pipeline for an-  
43 alyzing collections of shapes without requiring any correspondences. Our novel algorithm takes in two

44 classes of shapes and highlights the physical features that best describe the variation between them. We  
45 use a rigorous simulation framework to assess our approach. Lastly, as a case study, we use SINATRA  
46 to analyze molars from suborders of primates and demonstrate its ability recover known morphometric  
47 variation across phylogenies.

## 48 Introduction

49 Sub-image analysis is an important, yet open, problem in both medical imaging studies and geometric  
50 morphometric applications. One statement of this problem is, given two classes of 3D images or shapes  
51 (e.g. computed tomography (CT) scans of bones or magnetic resonance images (MRI) of different tissues),  
52 which physical features on the shapes are most important to defining a particular class label. More  
53 generally, the sub-image analysis problem can be framed as a regression-based task, where one is given  
54 a collection of shapes and the goal is to find the properties that explain the greatest variation in some  
55 response variable (continuous or binary). For example, one may be interested in identifying the structures  
56 of glioblastoma tumors that best indicate signs of potential relapse and other clinical outcomes [1]. From  
57 a statistical perspective, the sub-image selection problem is therefore directly related to the variable  
58 selection problem — given high-dimensional covariates and a univariate outcome, we want to infer which  
59 of the variables are most relevant in explaining or predicting variation in the observed response.

60 There are several challenges in framing sub-image analysis as a regression. The first challenge cen-  
61 ters around representing a 3D object as a (square integrable) covariate or feature vector. The desired  
62 transformation should have minimal loss in geometric information and should also be applicable to a  
63 wide range of shape and imaging datasets. In this paper, we will use a tool from integral geometry and  
64 differential topology called the Euler characteristic (EC) transform [1–4], which sufficiently maps shapes  
65 into vectors without requiring pre-specified landmark points or pairwise correspondences. This property  
66 will be central to our innovations. Once we are given a vector representation of the shape, the second  
67 challenge in framing sub-image analysis as a regression-based problem is quantifying which topological  
68 features are most relevant in explaining variation in a continuous outcome or binary class label. This is the  
69 classic take on variable selection which we address using a Bayesian regression model and an information  
70 theoretic metric to measure the relevance of each topological feature. Importantly, our Bayesian method  
71 allows us to perform variable selection for nonlinear functions — again, we will discuss the importance of  
72 this requirement later. The last challenge deals with how to interpret the most informative topological  
73 features obtained by our variable selection methodology. An important property of the EC transform is  
74 that it is invertible; thus, we can take the most informative topological features and naturally recover  
75 the physical regions on the shape that are most informative. In this paper, we introduce SINATRA: a  
76 unified statistical pipeline for sub-image analysis that addresses each of these challenges and is the first  
77 sub-image analysis method that does not require landmarks or correspondences.

78 Classically there have been three approaches to modeling random 3D images and shapes: (i) landmark-  
79 based representations [5], (ii) diffeomorphism-based representations [6], and (iii) representations that use  
80 integral geometry and excursions of random fields [7]. The main idea behind landmark-based analysis is  
81 that there are points on shapes that are known to be in correspondence with each other. As a result, any  
82 shape can be represented as a collection of 3D coordinates. The shortcoming with landmark-based ap-  
83 proaches is twofold. First, many modern datasets are not defined by landmarks; instead, they consist  
84 of 3D CT scans [8, 9]. Second, reducing these detailed mesh data to simple landmarks often results in a  
85 great deal of information loss. Alternatively, diffeomorphism-based approaches have bypassed the need  
86 for landmarks. There has also been a great deal of progress in developing tools that efficiently compare  
87 the similarity between shapes in large databases via algorithms that continuously deform one shape into  
88 another [10–14]. Unfortunately, these methods require that shapes be diffeomorphic: a continuous trans-  
89 formation between two shapes that places them in correspondence. There are many applications where  
90 shapes and images cannot be placed in correspondence because of qualitative differences. For example, in

91 a dataset of fruit fly wings, some mutants may have extra lobes of veins [15]; or, in a dataset of brain ar-  
92 teries, many of the arteries cannot be continuously mapped to each other [16]. Indeed, in large databases  
93 such as the MorphoSource [9], the CT scans of skulls across many clades will not be diffeomorphic. Thus,  
94 there is a real need for 3D image analysis methods that do not require correspondences.

95 In previous work [2], two topological transformations for shapes were introduced: the persistent  
96 homology (PH) transform and the EC transform were introduced. These tools from integral geometry  
97 first allowed for pairwise comparisons between shapes or images without requiring correspondence or  
98 landmarks. Since then, mathematical foundations of the two transforms and their relationship to the  
99 theory of sheaves and fiber bundles have been established [3, 4]. Detailed mathematical analyses have  
100 also been provided [3]. Most relevant to our approach, in this paper, is a nonlinear regression framework  
101 which uses the EC transform to predict outcomes of disease free survival in glioblastoma [1]. The two  
102 major takeaways from this work is that the EC transform reduces the problem of regression with shape  
103 covariates into a problem in functional data analysis (FDA), and that nonlinear regression models are  
104 more accurate than linear models when predicting complex phenotypes and traits. The SINATRA pipeline  
105 further enhances the relation between FDA and topological transforms by enabling variable selection with  
106 shapes as covariates.

107 Beyond the pipeline, other notable contributions of this paper include software packaging to implement  
108 our approach, and a detailed design of rigorous simulation studies that may be used to assess the accuracy  
109 of sub-image selection methods. The freely available software comes with several built-in capabilities that  
110 are integral to sub-image analyses in both biomedical studies and geometric morphometric applications.  
111 First, and foremost, SINATRA does not require landmarks or correspondences in the data. Second,  
112 given a dataset of normalized and axis aligned 3D images, SINATRA will output evidence measures that  
113 highlight the physical regions of shapes that are most variable between two predefined classes. There are  
114 many applications where users may suspect *a priori* that certain landmarks may vary across groups of  
115 shapes (e.g. via the literature). To this end, SINATRA also provides notions of statistical “significance”  
116 for any region of interest (ROI) by computing p-values and Bayes factor estimates that effectively detail  
117 how likely it is to be informative by chance [17].

118 Throughout the rest of the paper, we will describe each mathematical step of the SINATRA pipeline,  
119 and demonstrate its power and utility via simulations. We will also use a dataset of mandibular molars  
120 from four different genera of primates to show that our method has the ability to (i) further understanding  
121 of how landmarks vary across evolutionary scales in morphology and (ii) visually detail how known  
122 anatomical aberrations are associated to specific disease classes and/or case-control studies.

## 123 Results

### 124 SINATRA Pipeline Overview

125 The SINATRA pipeline generally implements four key steps (Fig. 1). First, the geometry of 3D shapes  
126 (represented as triangular meshes) is summarized by a collection of vectors (or curves) that encode  
127 changes in their topology. Second, a nonlinear Gaussian process model, with the topological summaries  
128 as input variables, is used to classify the shapes. Third, an effect size analog and corresponding association  
129 metric is computed for each topological feature used in the classification model. These quantities provide  
130 a notion of evidence that a given topological feature is associated with a particular class. Fourth, the  
131 topological features are iteratively mapped back onto the original shapes (in rank order according to their  
132 association measures) via a reconstruction algorithm. This allows us to highlight the physical (spatial)  
133 locations that best explain the variation between the two groups. Details of our implementation choices  
134 are detailed below, with theoretical support given in SI Appendix.

135 **Step One: Topological Summary Statistics for 3D Shapes.** In the first step of the SINATRA  
136 pipeline, we use a tool from integral geometry and differential topology called the Euler characteristic  
137 (EC) transform [1–4]. Briefly, for a mesh  $\mathcal{M}$ , the Euler characteristic is one of the accessible topological  
138 invariants derived using the following summation

$$139 \quad \chi = \#V(\mathcal{M}) - \#E(\mathcal{M}) + \#F(\mathcal{M}), \quad (1)$$

140 where  $\{\#V(\mathcal{M}), \#E(\mathcal{M}), \#F(\mathcal{M})\}$  denote the number of vertices (corners), edges, and faces of the mesh,  
141 respectively. An EC curve  $\chi_\nu(\mathcal{M})$  tracks the change in the Euler characteristic, with respect to a given  
142 filtration of length  $l$  in direction  $\nu$  (Figs. 1(a) and (b)). Mathematically, this is done by first specifying  
143 a height function  $h_\nu(\mathbf{x}) = \mathbf{x}^\top \nu$  for vertex  $\mathbf{x} \in M$  in direction  $\nu$ . We then use this height function to  
144 define sublevel sets (or subparts) of the mesh  $\mathcal{M}_\nu^a$  in direction  $\nu$ , where  $h_\nu(\mathbf{x}) \leq a$ . The EC curve is  
145 simply  $\chi(\mathcal{M}_\nu^a)$  over a range of  $l$  filtration steps over  $a$  (Fig. 1(b)). The EC transform is the collection of  
146 EC curves across a set of directions  $\nu = 1, \dots, m$ , and effectively maps a 3D shape into a concatenated  
147  $p = (l \times m)$ -dimensional feature vector. For a study with  $n$ -shapes, an  $n \times p$  design matrix  $\mathbf{X}$  is to be  
148 statistically analyzed, where the columns denote the Euler characteristic computed at a given filtration  
149 step and direction. Each sublevel set value, direction, and set of shape vertices used to compute an EC  
150 curve are stored for the association mapping and projection phases of the pipeline. Note that notions  
151 of sufficiency, stating the  $m$  number of directions and the  $l$  range of sublevel set values required for the  
152 EC transform to preserve all information for a family of shapes, have been previously provided [3]. In  
153 this paper, we will use simulations to outline empirical procedures and develop intuition behind these  
154 quantities.

155 **Step Two: Shape Classification.** In the second step of the SINATRA pipeline, we use (weight-space)  
156 Gaussian process probit regression to classify shapes based on their topological summaries generated by  
157 the EC transformation. Namely, we specify the following (Bayesian) hierarchical model [18–22]

$$158 \quad \mathbf{y} \sim \mathcal{B}(\boldsymbol{\pi}), \quad \mathbf{g}(\boldsymbol{\pi}) = \Phi^{-1}(\boldsymbol{\pi}) = \mathbf{f}, \quad \mathbf{f} \sim \mathcal{N}(\mathbf{0}, \mathbf{K}), \quad (2)$$

159 where  $\mathbf{y}$  is an  $n$ -dimensional vector of Bernoulli distributed class labels,  $\boldsymbol{\pi}$  is an  $n$ -dimensional vector  
160 representing the underlying probability that a shape is classified as a “case” (i.e.  $y = 1$ ),  $\mathbf{g}(\cdot)$  is a  
161 probit link function with  $\Phi(\cdot)$  being the cumulative distribution function (CDF) of the standard normal  
162 distribution, and  $\mathbf{f}$  is an  $n$ -dimensional vector estimated from the data. The key objective of SINATRA  
163 is to use the topological features in  $\mathbf{X}$  to find the physical 3D properties that best explain the variation  
164 across shape classes. To accomplish this objective, we use kernel regression where the utility of generalized  
165 nonparametric statistical models is well-established due their ability to account for various complex data  
166 structures [23–28]. Generally, kernel methods posit that  $\mathbf{f}$  lives within a reproducing kernel Hilbert  
167 space (RKHS) defined by some (nonlinear) covariance function that implicitly account for higher-order  
168 interactions between features, leading to more complete classifications of data [29–31]. To this end, we  
169 assume  $\mathbf{f}$  to be normally distributed with mean vector  $\mathbf{0}$ , and covariance matrix  $\mathbf{K}$  defined by the radial  
170 basis function  $\mathbf{K}_{ij} = \exp\{-\theta\|\mathbf{x}_i - \mathbf{x}_j\|^2\}$  with bandwidth  $\theta$  set using the median heuristic [32]. The full  
171 model specified in Equation (2) is commonly referred to as “Gaussian process classification” or GPC.

172 **Step Three: Feature (Variable) Selection.** To estimate the model in Equation (2), we use an  
173 elliptical slice sampling Markov chain Monte Carlo (MCMC) algorithm (SI Appendix Section 1.1). This  
174 enables samples to be taken from the approximate posterior distribution of  $\mathbf{f}$  (given the data), and also  
175 allows for the computation of an effect size analog for each topological summary statistic [33–35]

$$176 \quad \boldsymbol{\beta} = (\mathbf{X}^\top \mathbf{X})^\dagger \mathbf{X}^\top \mathbf{f}, \quad (3)$$

177 where  $(\mathbf{X}^\top \mathbf{X})^\dagger$  is the generalized inverse of  $(\mathbf{X}^\top \mathbf{X})$ . These effect sizes represent the nonparametric equiv-  
178 alent to coefficients in linear regression using generalized ordinary least squares. SINATRA uses these  
179 weights and assigns a measure of relative centrality to each summary statistic (first panel Fig. 1(c)) [35].  
180 Specifically, this criterion evaluates how much information in classifying each shape is lost when a particu-  
181 lar topological feature is removed from the model. This is determined by computing the Kullback-Leibler  
182 divergence (KLD) between (i) the conditional posterior distribution  $p(\boldsymbol{\beta}_{-j} | \beta_j = 0)$  with the effect of the  
183  $j$ -th topological feature being set to zero, and (ii) the marginal posterior distribution  $p(\boldsymbol{\beta}_{-j})$  with the  
184 effects of the  $j$ -th feature being integrated out. Namely,

$$185 \quad \text{KLD}(\beta_j) = \int_{\boldsymbol{\beta}_{-j}} \log \left( \frac{p(\boldsymbol{\beta}_{-j})}{p(\boldsymbol{\beta}_{-j} | \beta_j = 0)} \right) p(\boldsymbol{\beta}_{-j}) d\boldsymbol{\beta}_{-j} \quad j = 1, \dots, p. \quad (4)$$

186 which has a closed form solution when the posterior distribution of the effect sizes is assumed to be  
187 (approximately) Gaussian (SI Appendix 1.2). Finally, we normalize to obtain an association metric  
188 for each topological feature,  $\gamma_j = \text{KLD}(\beta_j) / \sum \text{KLD}(\beta_i)$ . There are two main takeaways from this  
189 formulation. First, the KLD is a non-negative quantity, and equals zero if and only if the posterior  
190 distribution of  $\boldsymbol{\beta}_{-j}$  is independent of the effect  $\beta_j$ . Intuitively, this is equivalent to saying that removing  
191 an unimportant shape feature will have no impact on explaining the variance between shape classes. The  
192 second key takeaway is that  $\gamma$  is bounded on the unit interval  $[0, 1]$ , with the natural interpretation of  
193 providing relative evidence of association for shape features; higher values suggesting greater importance.  
194 For this metric, the null hypothesis assumes that every feature equally contributes to the total variance  
195 between shape classes, while the alternative proposes that some features are indeed more central to  
196 this explanation than others [35]. As we will show in the coming sections, when the null assumption  
197 is met, SINATRA will display association results that appear uniformly distributed and effectively  
198 indistinguishable.

199 **Step Four: Reconstruction.** After obtaining association measures for each topological feature, we  
200 map this information back onto the physical shape (second panel Fig. 1(c) and 1(d)). We refer to this  
201 process as *reconstruction*, as this procedure recovers regions that explain the most variation between shape  
202 classes (SI Appendix Section 1.3). Intuitively, the goal is to identify vertices on the shape that correspond  
203 to topological features with the greatest association measures. Begin by considering  $d$  directions all within  
204 a cone of cap radius or angle  $\theta$ , which we denote as  $\mathcal{C}(\theta) = \{\nu_1, \dots, \nu_d | \theta\}$ . Next, let  $\mathcal{Z}$  be the set of  
205 vertices whose projections onto the directions in  $\mathcal{C}(\theta)$  are contained within the collection of “significant”  
206 topological features — meaning, for every  $z \in \mathcal{Z}$ , the product  $z \cdot \nu$  is contained within a sublevel set  
207 (taken in the direction  $\nu \in \mathcal{C}(\theta)$ ) that shows high evidence of association in the feature selection step. A  
208 reconstructed region is then defined as the union of all mapped vertices from each cone, or  $\mathcal{R} := \bigcup_i \mathcal{Z}_i$ .  
209 The choice to use cones is motivated by the idea that vectors of Euler characteristics taken along directions  
210 close together will express comparable information, allowing us to leverage findings between them and  
211 increase our power of detecting truly associated shape vertices and regions — this as opposed to antipodal  
212 directions where the lack of shared information may do harm when determining reconstructed manifolds  
213 (SI Appendix Section 1.4) [3, 36, 37].

214 **Visualization of Enrichment.** Once shapes have been reconstructed, we can visualize the relative  
215 importance or “evidence potential” for each vertex on the mesh. This is computed using the following  
216 simple procedure. First, we sort the topological features from largest to smallest, in descending order,  
217 according to their association measures  $\gamma_1 \geq \gamma_2 \geq \dots \geq \gamma_p$ . Next, we iteratively move through the  
218 sorted measures  $T_k = \gamma_k$  (starting with  $k = 1$ ), and we reconstruct the vertices corresponding to the  
219 topological features in the set  $\{j : \gamma_j \geq T_k\}$ . The evidence potential for each vertex is then defined  
220 as the largest threshold  $T_k$  at which it is reconstructed for the first time. Here, the key intuition is  
221 that vertices with earlier “birth times” in the reconstruction are more important relative to vertices that

222 appear later. We illustrate these values via heatmaps over the reconstructed meshes (Fig. 1(d)). For  
223 consistency across different applications and case studies, we set the coloring of these heatmaps to be on  
224 a scale from  $[0 - 100]$ . Here, a maximum value of 100 represents the threshold value at which the first  
225 vertex is born, while 0 denotes the threshold when the last vertex on the shape is reconstructed. Under  
226 the null hypothesis, where there are no meaningful regions differentiating between two classes of shapes,  
227 (mostly) all vertices will appear to be born relatively early and at the same time. This will not be the  
228 case under the alternative.

229 **Algorithmic Overview and Implementation.** Software for implementing the steps in the SINATRA  
230 pipeline is carried out in R code, which is freely available at <https://github.com/lcrawlab/SINATRA>.  
231 This algorithm requires the following inputs: (i) axis aligned shapes represented as meshes; (ii)  $\mathbf{y}$ , a  
232 binary vector denoting shape classes; (iii)  $r$ , the radius of the bounding sphere for the shapes (which we  
233 usually set to  $1/2$  since we work with meshes normalized to the unit ball); (iv)  $c$ , the number of cones  
234 of directions; (v)  $d$ , the number of directions within each cone; (vi)  $\theta$ , the cap radius used to generate  
235 directions in a cone; and (vii)  $l$ , the number of sublevel sets (i.e. filtration steps) to compute the Euler  
236 characteristic (EC) along a given direction. In the next two sections, we discuss strategies for how to  
237 choose values for the free parameters through simulation studies. A table detailing scalability for the  
238 current algorithmic implementation can be found in SI Appendix (see Table S1).

## 239 Simulation Study: Perturbed Spheres

240 We begin with a simple proof-of-concept simulation study to demonstrate the power of our proposed  
241 pipeline and illustrate how different parameter value choices will affect its ability to detect truly associated  
242 features on 3D shapes. To do so, we take 100 spheres and perturb regions on their surfaces to create two  
243 equally sized classes. This is done by using the following two-step procedure:

- 244 • First, we generate a fixed number of (approximately) equidistributed points on each sphere: some  
245 number  $u$  regions to be shared across classes, and the remaining  $v$  regions to be unique to class  
246 assignment.
- 247 • Second, within each region, we perturb the  $k$  closest vertices  $\{\mathbf{x}_1, \mathbf{x}_2, \dots, \mathbf{x}_k\}$  by a pre-specified scale  
248 factor  $\alpha$  and add some random normally distributed noise  $\epsilon_i \sim \mathcal{N}(0, 1)$ . Formally, this specified as  
249  $\mathbf{x}_i^* := \mathbf{x}_i\alpha + \epsilon_i$  for  $i = 1, \dots, k$ .

250 We consider three scenarios based on the number of shared and unique regions between shape classes  
251 (Figs. 2(a)-2(c)). Specifically, we choose  $u/v = 2/1$  (scenario I),  $6/3$  (scenario II), and  $10/5$  (scenario III),  
252 and set all regions to be  $k = 10$  vertices-wide. Intuitively, each sequential scenario represents an increase  
253 in degree of difficulty. Class-specific regions should be harder to identify in shapes with more complex  
254 structures. We analyze fifty different simulated datasets for each of the three scenarios. In each simulated  
255 dataset, only vertices used to create class-specific regions are defined as true positives, and we quantify  
256 SINATRA's ability to prioritize these true vertices using receiver operating characteristic (ROC) curves  
257 plotting true positive rates (TPR) against false positive rates (FPR) (SI Appendix Section 2). We then  
258 evaluate SINATRA's power as a function of its free parameter inputs:  $c$  number of cones,  $d$  number of  
259 directions per cone, direction generating cap radius  $\theta$ , and  $l$  number of sublevel sets per filtration. Here,  
260 we iteratively vary each parameter across a wide range of appropriate values, while holding the others at  
261 fixed constants  $\{c = 25, d = 5, \theta = 0.15, l = 30\}$ . Figures displayed in the main text are based on varying  
262 the number of cones (Figs. 2(d)-2(f)), while results for the other sensitivity analyses can be found in SI  
263 Appendix (Figs. S1-S3).

264 As expected, SINATRA's ability to detect associated regions depends on the proportion of shape  
265 class variance  $\mathbb{V}(\mathbf{y})$  that is explained by each of the corresponding associated vertices. More specifically,  
266 the algorithm's performance is consistently better when shapes are defined by just a few prominent

267 regions (e.g. scenario I) versus when shape definitions are more complex (e.g. scenarios II and III).  
268 This is because, in the former setting, associated vertices make greater individual-level contributions to  
269 the overall variance between classes (i.e.  $\mathbb{V}(\mathbf{y})/10 > \mathbb{V}(\mathbf{y})/30 > \mathbb{V}(\mathbf{y})/50$ ). Note that similar trends in  
270 performance have been shown during the assessment of high-dimensional variable selection methods in  
271 other application areas [38–40].

272 This simulation study also allows us to demonstrate the general behavior and effectiveness of the  
273 SINATRA algorithm as a function of different choices for its free input parameters. First, we assess  
274 what happens to our power when we adjust the number of cones of directions used to compute Euler  
275 characteristic curves. The key takeaway for this parameter is that computing topological summary  
276 statistics over just a single cone of directions (i.e.  $c = 1$ ) is ineffective at capturing enough variation to  
277 identify class-specific regions (Figs. 2(d)-2(f)). This supports the intuition that seeing more of a shape  
278 leads to an improved ability to understand its complete structure [1–3]. Our empirical results show that  
279 this can be achieved by summarizing the shapes with filtrations taken over multiple directions. As a  
280 result, in practice, we suggest specifying multiple cones  $c > 1$  and utilizing multiple directions  $d$  per cone  
281 (see monotonically increasing power in Fig. S1). While the other two parameters do not have monotonic  
282 properties, their effects on SINATRA’s performance still have natural interpretations. For example, when  
283 changing the angle between directions within cones from  $\theta \in [0.05, 0.5]$  radians, we observe that power  
284 steadily increases until  $\theta = 0.25$  radians and then slowly decreases afterwards (Fig. S2). This supports  
285 previous theoretical results that state cones should be defined by directions that are in close proximity to  
286 each other [3]; but not too close such that they effectively explain the same local information with little  
287 variation. Lastly, and perhaps most importantly, is understanding the performance of the algorithm as  
288 a function of the number of sublevel sets  $l$  (i.e. the number of steps in the filtration) used to compute  
289 Euler characteristic curves. As we will show in the next section, this depends on the types of shapes  
290 being analyzed. Intuitively, for very intricate shapes, coarse filtrations with too few sublevel sets will  
291 cause the algorithm to miss or “step over” very local undulations in a shape. For the spheres simulated  
292 in this section, class-defining regions are global-like features, and so finer filtration steps fail to capture  
293 this information (Fig. S3); however, this is less important when only a few features decide how shapes are  
294 defined (e.g. scenario I). To this end, in practice, we recommend choosing the angle between directions  
295 within cones  $\theta$  and the number of sublevel sets  $l$  via cross validation or some grid-based search.

296 As a final demonstration, we show what happens when the null assumptions of the SINATRA pipeline  
297 are met (Fig. S4). Recall that, under the null hypothesis, our feature selection measure assumes that all  
298 3D regions of a shape equally contribute to explaining the variance between classes — that is, no one  
299 vertex (or corresponding topological characteristics) is more important or more central than the others.  
300 Here, we generate synthetic shapes under the two cases when SINATRA will fail to produce significant  
301 results: (a) two classes of shapes that are effectively the same (up to some small Gaussian noise), and (b)  
302 two classes of shapes that are completely dissimilar. In the first simulation case, there are no “significantly  
303 associated” regions and thus no group of vertices distinctively stand out as being important (Fig. S4(a)).  
304 In the latter simulation case, shapes between the two classes look nothing alike; therefore, all vertices  
305 contribute to class definition, but no one feature is central or key to explaining the observed variation  
306 (Fig. S4(b)).

## 307 **Simulation Study: Caricatured Shapes**

308 We further assess the SINATRA pipeline using a second simulation study where we modify computed to-  
309 mography (CT) scans of real Lemuridae teeth (one of the five families of Strepsirrhini primates commonly  
310 known as lemurs) [41] using a well-known caricaturization procedure [42]. Briefly, we fix the triangular  
311 mesh of an individual tooth and specify class-specific regions centered around expert-derived biological  
312 landmarks (Fig. 3) [10]. For each triangular face contained within a class-specific region, we multiply a  
313 corresponding affine transformation by a positive scalar that smoothly varies on the triangular mesh and  
314 attains maximum value at the biological landmark used to define the region (SI Appendix Section 3).

315 We caricature 50 different teeth according to the following procedure (Fig. 3(a)):

- 316 • First, we take the expert-derived landmarks for a given tooth, and assign  $v$  of them to be specific  
317 to one class and  $v'$  to be specific to the other class.
- 318 • Second, we perform the caricaturization where each face in the  $v$  and  $v'$  class-specific regions is  
319 multiplied by a positive scalar (i.e. exaggerated or enhanced). This is repeated twenty-five times  
320 (with some small noise per replicate) to create two equally-sized classes of 25 shapes.

321 Here, we explore two scenarios by varying the number of class-specific landmarks  $v$  and  $v'$  that determine  
322 the caricaturization in each class. In the first, we set both  $v, v' = 3$ ; while, in the second, we fix  $v, v' = 5$ .  
323 As in the previous simulations with perturbed spheres, the difficulty of the scenarios increases with the  
324 number of caricatured regions. We evaluate SINATRA's ability to identify the vertices involved in the  
325 caricaturization using ROC curves (SI Appendix Section 2), and we again assess this estimate of power  
326 as a function of the algorithm's free parameter inputs. While varying each parameter, we hold the others  
327 at fixed constants  $\{c = 15, d = 5, \theta = 0.15, l = 50\}$ . Figures described in the main text are based on  
328 varying the number of cones (Figs. 3(b) and 3(c)), and results for the other sensitivity analyses can be  
329 found in SI Appendix (Figs. S5-S7).

330 Overall, as noted above, scenarios where classes are determined using fewer caricatured regions result  
331 in better (or at least comparable) performance than scenarios which used more regions. Similar to the  
332 simulations with perturbed spheres, we observe that SINATRA's power increases monotonically with an  
333 increasing number of cones and directions used to compute the topological summary statistics (Figs. 3(b),  
334 3(c), and S5). For example, at a 10% FPR with  $c = 5$  cones, we achieve 30% TPR in scenario I experiments  
335 and 35% in scenario II. Increasing the number of cones to  $c = 35$  improves power to 52% and 40% TPR  
336 for scenarios I and II, respectively. Trends from the previous section also remain consistent when choosing  
337 the angle between directions within cones (Fig. S6) and the number of sublevel sets (Fig. S7). Results  
338 for the former again suggest that there is an optimal cap radius to be used when generating directions  
339 in a cone. For the latter, since we are analyzing shapes with more intricate features, finer filtrations lead  
340 to more power.

## 341 Recovering Known Morphological Variation Across Genera of Primates

342 As a real application of our pipeline, with "ground truth" or known morphological variation, we consider  
343 a dataset of CT scans of  $n = 59$  mandibular molars from two suborders of primates: Haplorhini (which  
344 include tarsiers and anthropoids) and Strepsirrhini (which include lemurs, galagos, and lorises). From  
345 the haplorhine suborder, there were 33 molars from the genus *Tarsius* [10, 43, 44] and 9 molars from the  
346 genus *Saimiri* [45]. From the strepsirrhine suborder, we have two examples of lemurs with 11 molars  
347 coming from the genus *Microcebus* and 5 molars being derived from the genus *Mirza* [10, 43, 44]. The  
348 meshes of all teeth were aligned, translated to be centered at the origin, and normalized to be enclosed  
349 within a unit sphere (SI Appendix Section 4 and Fig. S8).

350 This specific collection of molars was selected because morphologists and evolutionary anthropologists  
351 have come to understand variation of the paraconid, the cusp of a primitive lower molar. The paraconids  
352 are retained only by *Tarsius* and do not appear in the other genera (Fig. 4(a)) [45, 46]. Phylogenetic  
353 analyses of mitochondrial genomes across primates place estimates of divergence dates of the subtree  
354 composed of *Microcebus* and *Mirza* from *Tarsius* at 5 million years before the branching of *Tarsius* from  
355 *Saimiri* [47]. Our main objective is to see if SINATRA recovers the information that the paraconids are  
356 specific to the *Tarsius* genus and whether variation across the molar is associated to the divergence time  
357 of the genera.

358 Since *Tarsius* is the only genus with the paraconid in this sample, we used SINATRA to perform three  
359 pairwise classification comparisons (*Tarsius* against *Saimiri*, *Mirza*, and *Microcebus*, respectively), and  
360 assessed SINATRA's ability to prioritize/detect the location of the paraconid as the region of interest



361 (ROI). Based on our findings in the simulation studies, we run SINATRA with  $c = 35$  cones,  $d = 5$   
362 directions per cone, a cap radius of  $\theta = 0.25$  to generate each direction, and  $l = 75$  sublevel sets to  
363 compute topological summary statistics. In each comparison, we evaluate the evidence for each vertex  
364 based on the first time that it appears in the reconstruction. Again, we refer to this as the evidence  
365 potential for a vertex. We then display this information via a heatmap for each tooth (Fig. 4(b)), which  
366 allows us to visualize the physical regions that are most differential between the genera.

367 To assess the strength of SINATRA’s ability to find *Tarsius*-specific paraconids, we make use of a  
368 null-based scoring method. Here, we place an expert-derived paraconid landmark on each *Tarsius* tooth,  
369 and consider the  $K = \{10, 50, 100, 150, 200\}$  nearest vertices surrounding the landmark’s centermost  
370 vertex. This collection of  $K + 1$  vertices defines our ROI. Within each ROI, the SINATRA computed  
371 evidence potentials are weighted by the surface area (or area of the Voronoi cell) encompassed by their  
372 corresponding vertices, and then summed together. This aggregated value, which we will denote as  $\tau^*$ ,  
373 represents a score of association for the ROI. To construct a “null” distribution and assess the strength  
374 of any score  $\tau^*$ , we randomly select  $N = 500$  other “seed” vertices across the mesh of each *Tarsius* tooth  
375 and uniformly generate  $N$ -“null” regions that are  $K$ -vertices wide. Similar (null) scores  $\tau_1, \dots, \tau_N$  are  
376 then computed for each randomly generated region. A “p-value”-like quantity (for the  $i$ -th molar) is then  
377 generated by following

$$378 \quad P_i = \frac{1}{N + 1} \sum_{t=1}^N \mathbb{I}(\tau_i^* \leq \tau_t), \quad (5)$$

379 where  $\mathbb{I}(\cdot)$  denotes an indicator function, and a smaller  $P_i$  can be interpreted as having more confidence  
380 in SINATRA’s ability to find the desired paraconid landmark. To ensure the robustness of this analysis,  
381 we generate the  $N$ -random null regions via one of two ways: (i) using a  $K$ -nearest neighbors (KNN)  
382 algorithm on each of the  $N$ -random seed vertices [48], or (ii) manually constructing  $K$ -vertex wide null  
383 regions such that they have surface areas equal to that of the paraconid ROI (SI Appendix Section 5).  
384 In both settings, we take the median of the  $P_i$  values in Equation (5) across all teeth, and report them  
385 for each genus and choice of  $K$  combination (see the first half of Table 1). Notedly, using p-values as a  
386 direct metric of evidence can be problematic. For example, moving from  $P = 0.03$  to  $P = 0.01$  does not  
387 increase evidence for the alternative hypothesis (or against the null hypothesis) by a factor of 3. To this  
388 end, a calibration formula has been provided that transforms a p-value to a bound/approximation of a  
389 Bayes factor (BF) [17], the ratio of the marginal likelihood under the alternative hypothesis  $H_1$  versus  
390 the null hypothesis  $H_0$ , via the formula

$$391 \quad BF(P_i)_{10} = [-e P_i \log(P_i)]^{-1}, \quad (6)$$

392 for  $P_i < 1/e$  and  $BF(P_i)_{10}$  is an estimate of  $\Pr[H_1 | \mathcal{M}] / \Pr[H_0 | \mathcal{M}]$ , where  $\mathcal{M}$  are the molars as meshes  
393 and  $H_0$  and  $H_1$  are the null and alternative hypotheses, respectively. Table 1 reports the calibrated Bayes  
394 factor estimates as well.

395 Overall, we observe that the paraconid ROI is more strongly enriched in the comparisons between  
396 the *Tarsius* and either of the strepsirrhine primates, rather than for the *Tarsius-Saimiri* comparison.  
397 We suspect this difference is partly explained by the divergence times between these genera: *Tarsius*  
398 is more recently diverged from *Saimiri* than from the strepsirrhines. This conjecture is consistent with  
399 the intuition we developed in our simulation studies where classes of shapes with sufficiently different  
400 morphology result in more accurate identification of unique ROI. On the other hand, the *Tarsius-Saimiri*  
401 comparison is analogous to the simulations under to the null model: with the molars being too similar,  
402 no region appears key to explaining the variance between the two classes of primates.

## 403 Discussion

404 In this paper, we introduce SINATRA: the first statistical pipeline for sub-image analysis that does not  
405 require landmarks or correspondence points between images. We state properties of SINATRA using  
406 simulations and illustrate the practical utility of SINATRA on real data. The current formulation and  
407 software for SINATRA is limited to the classification setting. Extending the model and algorithm to the  
408 regression setting with continuous responses is trivial. There are many evolutionary applications where  
409 adaptation and heredity must first be disentangled in the analyses of continuous traits and phenotypes.  
410 The standard approach for this is to explicitly account for the hierarchy of descent by adding genetic  
411 covariance or kinship across species to the likelihood either via phylogenetic regression [49] or linear  
412 mixed models (e.g. the animal model) [50]. Modeling covariance structures also arises in statistical and  
413 quantitative genetics applications where individuals are related [51–53]. The SINATRA framework uses  
414 a Bayesian hierarchical model that is straightforward to adapt to analyze complex covariance structures  
415 in future work.

## 416 Acknowledgements

417 The authors would like to thank Ani Eloyan, Anthea Monod, Jenny Tung, and Christine Wall for helpful  
418 conversations and suggestions. This research was partly supported by grants P20GM109035 (COBRE  
419 Center for Computational Biology of Human Disease; PI Rand) and P20GM103645 (COBRE Center for  
420 Central Nervous; PI Sanes) from the NIH NIGMS, 2U10CA180794-06 from the NIH NCI and the Dana  
421 Farber Cancer Institute (PIs Gray and Gatsonis), as well as by an Alfred P. Sloan Research Fellowship  
422 (No. FG-2019-11622) awarded to LC. A majority of this research was conducted using computational  
423 resources and services at the Center for Computation and Visualization (CCV), Brown University. SM  
424 would like to acknowledge partial funding from HFSP RGP005, NSF DMS 17-13012, NSF BCS 1552848,  
425 NSF DBI 1661386, NSF IIS 15-46331, NSF DMS 16-13261, as well as high-performance computing par-  
426 tially supported by grant 2016-IDG-1013 from the North Carolina Biotechnology Center. Any opinions,  
427 findings, and conclusions or recommendations expressed in this material are those of the author(s) and  
428 do not necessarily reflect the views of any of the funders.

## 429 Author Contributions Statement

430 LC conceived the study. SM and LC developed the methods. BW, TS, and HK developed the algorithms  
431 and implemented the software. DB designed sampling strategy for the molar analysis. All authors  
432 performed the analyses, interpreted the results, and wrote and revised the manuscript.

## 433 Competing Financial Interests

434 The authors have declared that no competing interests exist.

435 **Figures and Tables**

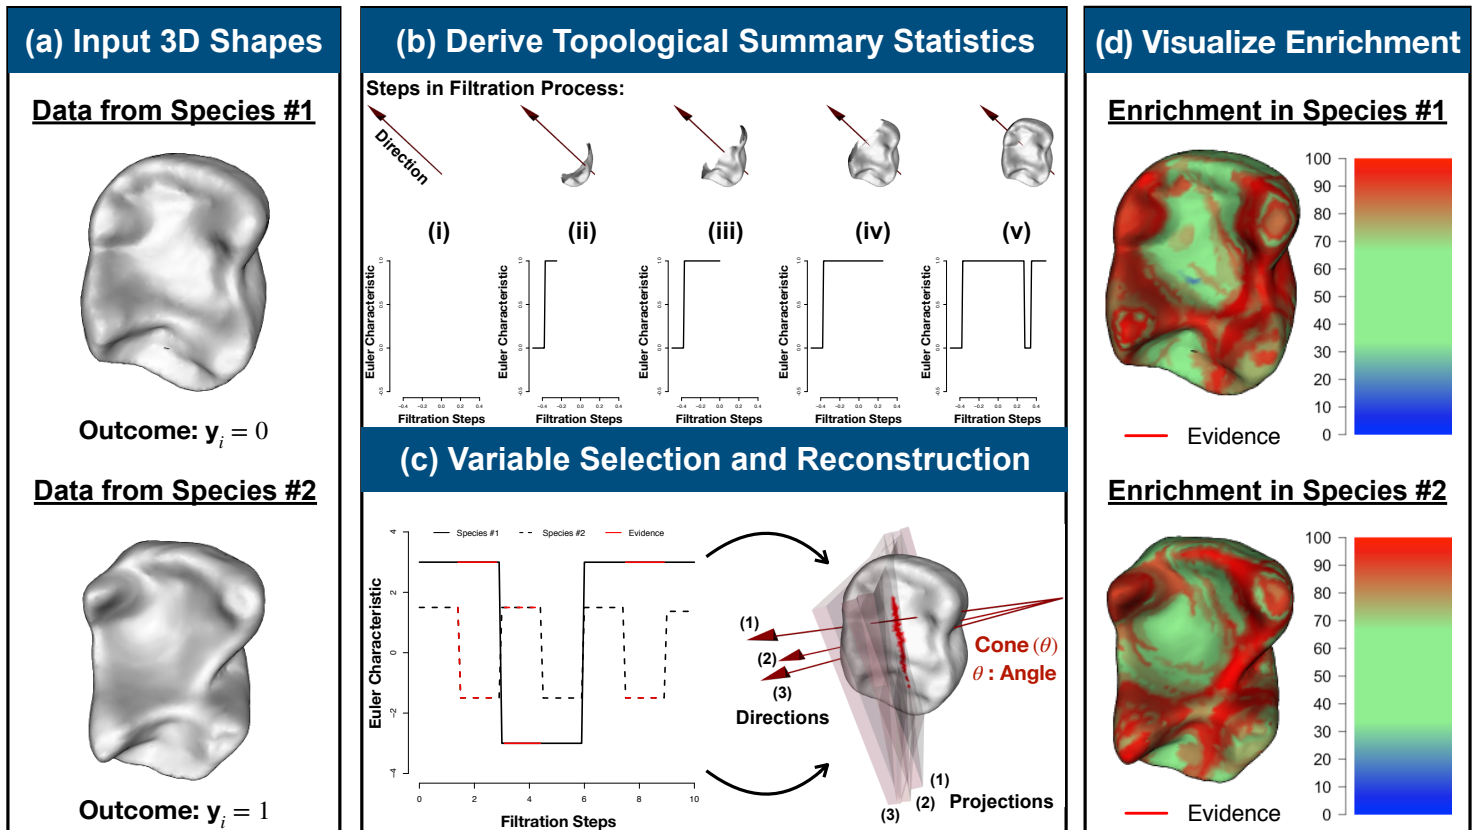

**Figure 1. Schematic overview of SINATRA: a novel statistical framework for feature selection and association mapping with 3D shapes.** (a) The SINATRA algorithm requires the following inputs: (i) aligned shapes represented as meshes; (ii)  $\mathbf{y}$ , a binary vector denoting shape classes; (iii)  $r$ , the radius of the bounding sphere for the shapes; (iv)  $c$ , the number of cones of directions; (v)  $d$ , the number of directions within each cone; (vi)  $\theta$ , the cap radius used to generate directions in a cone; and (vii)  $l$ , the number of sublevel sets (i.e. filtration steps) to compute the Euler characteristic (EC) along a given direction. (b) We first select initial positions uniformly on a unit sphere. Then for each position, we generate a cone of  $d$  directions within angle  $\theta$  using Rodrigues’ rotation formula [54], resulting in a total of  $m = c \times d$  directions. For each direction, we compute EC curves with  $l$  sublevel sets. We concatenate the EC curve along all the directions for each shape to form vectors of topological features of length  $p = l \times m$ . Thus, for a study with  $n$ -shapes, an  $n \times p$  design matrix is statistically analyzed using a Gaussian process classification model. (c) Evidence of association for each topological feature vector are determined using relative centrality measures. Using these measures, we reconstruct corresponding shape regions by identifying the vertices (or locations) on the shape that correspond to “statistically associated” topological features. (d) This enables us to visualize the enrichment of physical features that best explain the variance between the two classes. The heatmaps display vertex evidence potential on a scale from [0 – 100]. A maximum of 100 represents the threshold at which the first shape vertex is reconstructed, while 0 denotes the threshold when the last vertex is reconstructed.

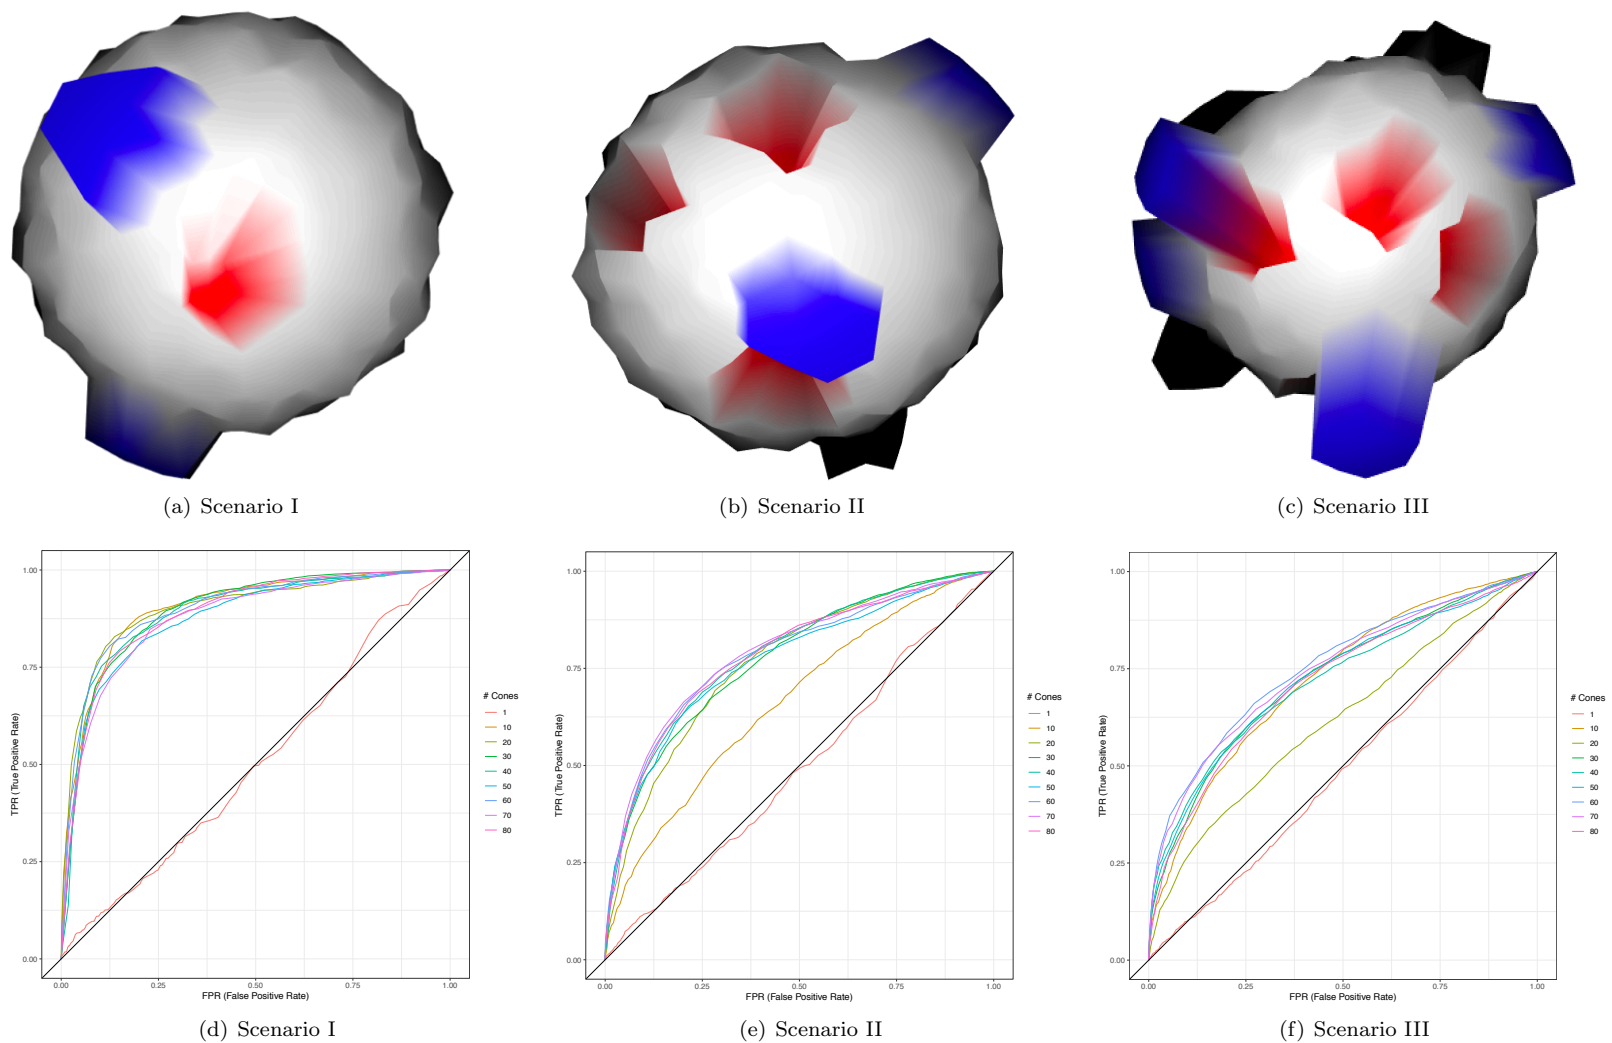

**Figure 2. Power analysis for detecting associated vertices across different classes of perturbed spheres.** Here, we generate 100 shapes by partitioning unit spheres into 10 vertex-wide regions, centered at 50 equidistributed points. Two classes (50 shapes per class) are defined by shared (blue protrusions) and class-specific (red indentations) characteristics. The shared or “non-associated” features are chosen by randomly selecting  $u$  regions and pushing the sphere outward at each of these positions. This is done for all shapes, regardless of class. To generate class-specific or “associated” features,  $v$  distinct regions are chosen for a given class and perturbed inward. We vary these parameters and analyze three increasingly more difficult simulation scenarios: **(a)**  $u = 2$  shared and  $v = 1$  associated; **(b)**  $u = 6$  shared and  $v = 3$  associated; and **(c)**  $u = 10$  shared and  $v = 5$  associated. In panels **(d)**-**(f)**, ROC curves depict the ability of SINATRA to identify vertices located within associated regions, as a function of increasing the number of cones of directions used in the algorithm. These results give empirical evidence that seeing more of a shape (i.e. using more unique directions) generally leads to an improved ability to map back onto associated regions. Other SINATRA parameters were fixed at the following:  $d = 5$  directions per cone,  $\theta = 0.15$  cap radius used to generate directions in a cone, and  $l = 30$  sublevel sets per filtration. Results are based on fifty replicates in each scenario.

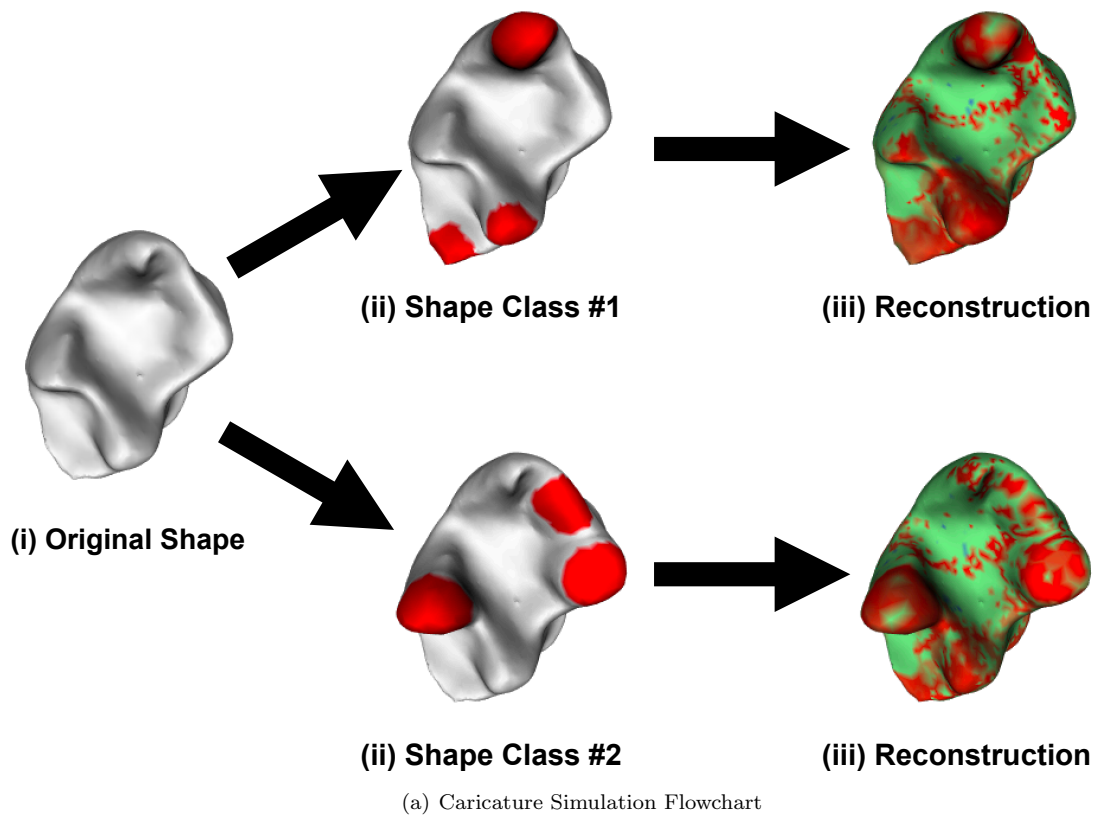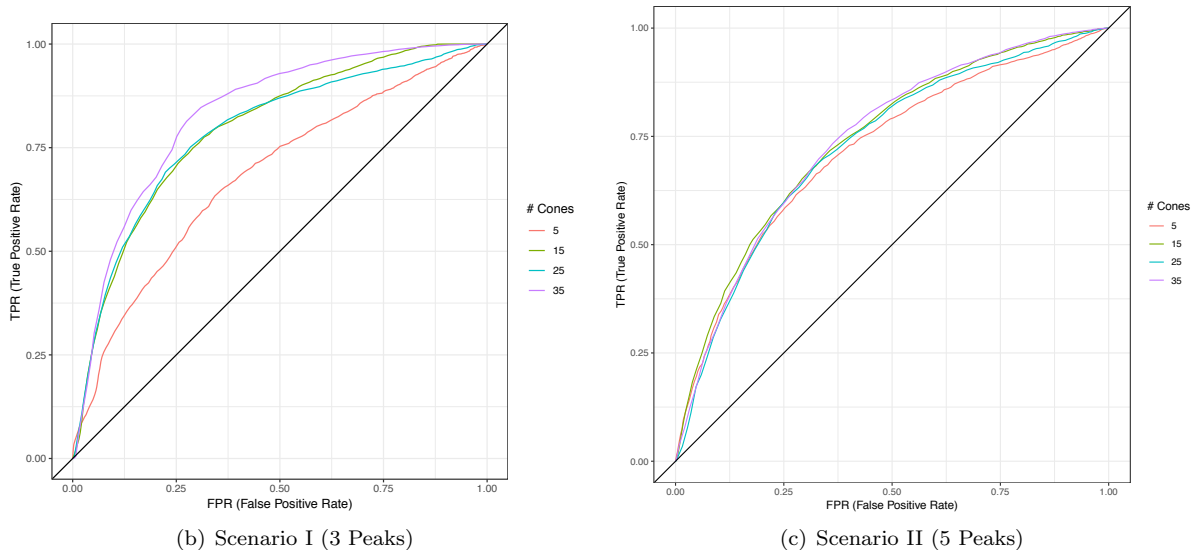

**Figure 3. Power analysis for detecting associated vertices across different classes of caricatured shapes.** (a) Here, we modify real Lemuridae molars using the following caricaturization procedure. (i) First, we fix the triangular mesh of an individual tooth. (ii) Next, we take expert-derived landmarks for the tooth [10], and assign  $v$  of them to be specific to one class and  $v'$  to be specific to the other. The caricaturization is performed by multiplying each face within these regions by positive scalars so that class-specific features are exaggerated. This is repeated twenty-five times (with some small added noise) to create two equally-sized classes of 25 shapes. (iii) The synthetic shapes are analyzed by SINATRA to identify the associated regions. We consider two scenarios by varying the number of class-specific landmarks that determine the caricaturization in each class. In scenario I, we set  $v, v' = 3$ ; and in scenario II,  $v, v' = 5$ . In panels (b) and (c), ROC curves depict the ability of SINATRA to identify vertices located within associated regions, as a function of increasing the number of cones of directions used in the algorithm. Other SINATRA parameters were fixed at the following:  $d = 5$  directions per cone,  $\theta = 0.15$  cap radius used to generate directions in a cone, and  $l = 50$  sublevel sets per filtration. Results are based on fifty replicates in each scenario.

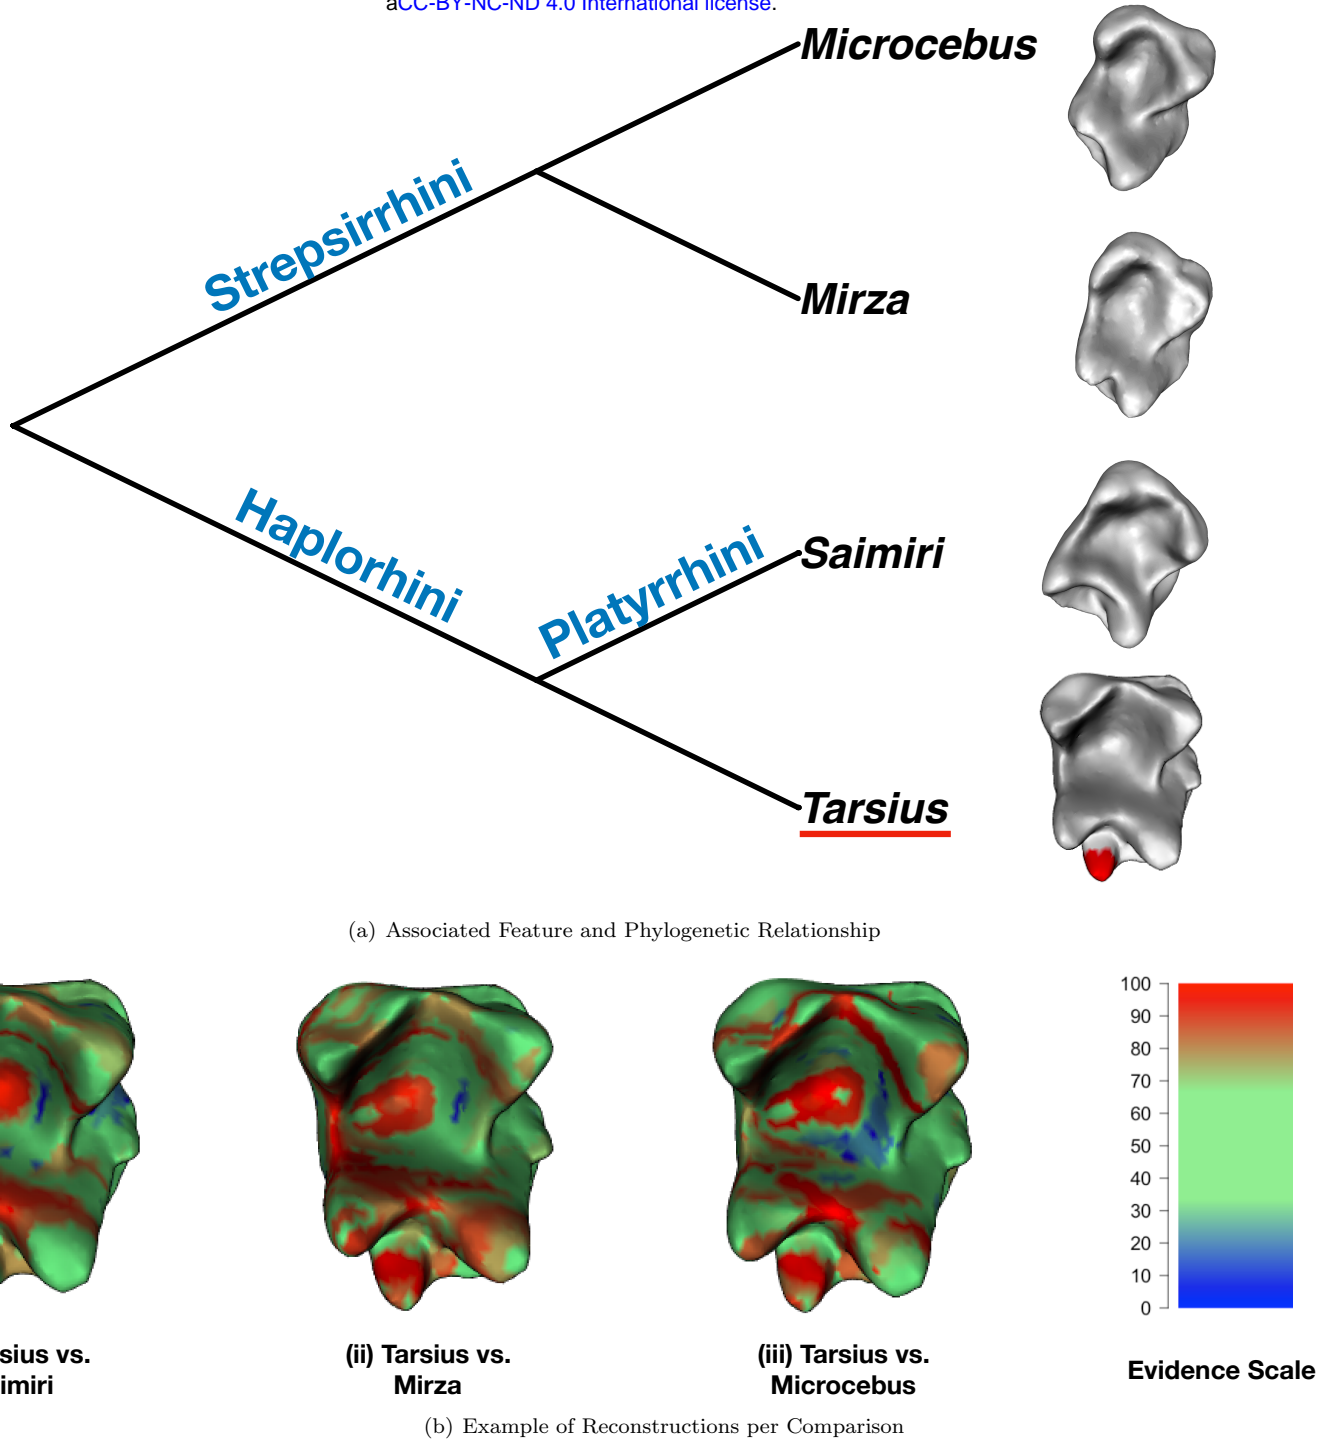

**Figure 4. Real data analysis aimed at detecting unique paraconids in molars belonging to primates in *Tarsius* genus.** Here, we carry out three different pairwise comparisons where we analyze the physical difference between *Tarsius* molars and teeth from (i) *Saimiri*, (ii) *Mirza*, and (iii) *Microcebus* genus, respectively. In panel (a), we depict the phylogenetic relationship between these groups. Morphologically, we know that tarsier teeth have an additional high-cusp (highlighted in red), which allows this genus of primate to reduce a wider range of foods [55]. The goal of this analysis is to assess SINATRA's ability to find this region of interest (ROI). In panel (b), we show an example of the reconstruction resulting from each comparison. Intuition behind these results is consistent both with the phylogeny of the primates, as well as with our previous simulation studies. Genetically, *Tarsius* differ more from the *Mirza* and *Microcebus* genus, rather than from *Saimiri*. As a result, SINATRA is powered to find the unique paraconid in the former two comparisons because of the appropriate genetic distance, rather than in the latter case where molar structure is much more similar. The heatmaps display vertex evidence potential on a scale from [0 – 100]. A maximum of 100 represents the threshold at which the first shape vertex is reconstructed, while 0 denotes the threshold when the last vertex is reconstructed.

|                           | Test       | Region Size | <i>Tarsius</i> vs. <i>Saimiri</i> | <i>Tarsius</i> vs. <i>Mirza</i>         | <i>Tarsius</i> vs. <i>Microcebus</i>    |
|---------------------------|------------|-------------|-----------------------------------|-----------------------------------------|-----------------------------------------|
| <i>P-Values (P)</i>       | KNN        | 10          | $4.75 \times 10^{-1}$             | $3.39 \times 10^{-1}$                   | $2.14 \times 10^{-1}$                   |
|                           |            | 50          | $2.89 \times 10^{-1}$             | $2.10 \times 10^{-1}$                   | $1.56 \times 10^{-1}$                   |
|                           |            | 100         | $2.14 \times 10^{-1}$             | <b><math>2.20 \times 10^{-2}</math></b> | <b><math>6.19 \times 10^{-2}</math></b> |
|                           |            | 150         | $1.99 \times 10^{-1}$             | <b><math>1.80 \times 10^{-2}</math></b> | <b><math>6.59 \times 10^{-2}</math></b> |
|                           |            | 200         | $2.22 \times 10^{-1}$             | <b><math>2.99 \times 10^{-2}</math></b> | <b><math>9.18 \times 10^{-2}</math></b> |
|                           | Equal-Area | 10          | $3.21 \times 10^{-1}$             | $2.10 \times 10^{-1}$                   | $1.84 \times 10^{-1}$                   |
|                           |            | 50          | $2.81 \times 10^{-1}$             | $1.72 \times 10^{-1}$                   | $1.26 \times 10^{-1}$                   |
|                           |            | 100         | $2.40 \times 10^{-1}$             | <b><math>4.39 \times 10^{-2}</math></b> | <b><math>8.78 \times 10^{-2}</math></b> |
|                           |            | 150         | $2.59 \times 10^{-1}$             | <b><math>3.79 \times 10^{-2}</math></b> | <b><math>8.18 \times 10^{-2}</math></b> |
|                           |            | 200         | $2.55 \times 10^{-1}$             | <b><math>4.39 \times 10^{-2}</math></b> | <b><math>9.98 \times 10^{-2}</math></b> |
| <i>Bayes Factors (BF)</i> | KNN        | 10          | —                                 | 1.003                                   | 1.115                                   |
|                           |            | 50          | 1.025                             | 1.122                                   | 1.269                                   |
|                           |            | 100         | 1.115                             | <b>4.381</b>                            | <b>2.136</b>                            |
|                           |            | 150         | 1.145                             | <b>5.087</b>                            | <b>2.053</b>                            |
|                           |            | 200         | 1.101                             | <b>3.505</b>                            | <b>1.678</b>                            |
|                           | Equal-Area | 10          | 1.009                             | 1.122                                   | 1.181                                   |
|                           |            | 50          | 1.031                             | 1.215                                   | 1.409                                   |
|                           |            | 100         | 1.074                             | <b>2.681</b>                            | <b>1.722</b>                            |
|                           |            | 150         | 1.051                             | <b>3.016</b>                            | <b>1.796</b>                            |
|                           |            | 200         | 1.055                             | <b>2.681</b>                            | <b>1.599</b>                            |

**Table 1. Null region experiment to evaluate SINATRA’s ability to find paraconids in *Tarsius molars*.** Here, the goal is to assess how likely it is that SINATRA finds the region of interest (ROI) by chance. To do so, we first generate 500 “null” regions on each *Tarsius* tooth using (i) a KNN algorithm and (ii) an equal-area approach (SI Appendix Section 5). Next, for each region, we sum the evidence potential or “birth times” of all the vertices it contains. Then, we compare how many times the aggregate scores for the ROI is less than those for the null regions. The median of these “p-values”, and their corresponding calibrated Bayes factors (BF) when median  $P < 1/e$ , across all teeth are provided above for the three primate comparisons. Results with values p-values less than 0.1 and BFs greater than 1.598 are given in bold.

## References

436

437

438

439

440

441

442

443

444

445

446

447

448

449

450

451

452

453

454

455

456

457

458

459

460

461

462

463

464

465

466

467

468

469

470

471

472

473

474

475

1. Crawford L, Monod A, Chen AX, Mukherjee S, Rabadán A. Functional data analysis using a topological summary statistic: The smooth Euler characteristic transform. arXiv. 2017;p. 1611.06818. Available from: <https://arxiv.org/abs/1611.06818>.
2. Turner K, Mukherjee S, Boyer DM. Persistent homology transform for modeling shapes and surfaces. *Inf Inference*. 2014;3(4):310–344. Available from: <https://academic.oup.com/imaia/article-abstract/3/4/310/724811?redirectedFrom=fulltext>.
3. Curry J, Mukherjee S, Turner K. How many directions determine a shape and other sufficiency results for two topological transforms. arXiv. 2018;p. 1805.09782. Available from: <https://arxiv.org/abs/1805.09782>.
4. Ghrist R, Levanger R, Mai H. Persistent homology and Euler integral transforms. *J Appl and Comput Topology*. 2018;2(1-2):55–60. Available from: <https://link.springer.com/article/10.1007/s41468-018-0017-1>.
5. Kendall DG. A Survey of the Statistical Theory of Shape. *Statist Sci*. 1989;4(2):87–99. Available from: <https://doi.org/10.1214/ss/1177012582>.
6. Dupuis P, Grenander U. Variational problems on flows of diffeomorphisms for image matching. *Q Appl Math*. 1998;LVI(3):587–600. Available from: <http://dl.acm.org/citation.cfm?id=298828.298844>.
7. Worsley KJ. Estimating the number of peaks in a random field using the Hadwiger characteristic of excursion Sets, with applications to medical images. *Ann Stat*. 1995;23(2):640–669. Available from: <https://doi.org/10.1214/aos/1176324540>.
8. Goswami A. Phenome10K: a free online repository for 3-D scans of biological and palaeontological specimens; 2015. Available from: [www.phenome10k.org](http://www.phenome10k.org).
9. Boyer DM, Gunnell GF, Kaufman S, McGeary TM. Morphosource: archiving and sharing 3-D digital specimen data. *The Paleontological Society Papers*. 2016;22:157–181.
10. Boyer DM, Lipman Y, St Clair E, Puente J, Patel BA, Funkhouser T, et al. Algorithms to automatically quantify the geometric similarity of anatomical surfaces. *Proc Natl Acad Sci U S A*. 2011;108(45):18221. Available from: <http://www.pnas.org/content/108/45/18221.abstract>.
11. Ovsjanikov M, Ben-Chen M, Solomon J, Butscher A, Guibas L. Functional maps: a flexible representation of maps between shapes. *ACM Trans Graph*. 2012;31(4):30:1–30:11. Available from: <http://doi.acm.org/10.1145/2185520.2185526>.
12. Boyer DM, Puente J, Gladman JT, Glynn C, Mukherjee S, Yapuncich GS, et al. A new fully automated approach for aligning and comparing shapes. *Anat Rec (Hoboken)*. 2015;298(1):249–276. Available from: <https://onlinelibrary.wiley.com/doi/abs/10.1002/ar.23084>.
13. Gao T, Kovalsky SZ, Daubechies I. Gaussian process landmarking on manifolds. *SIAM J Math Data Sci*. 2019;1(1):208–236. Available from: <https://epubs.siam.org/doi/abs/10.1137/18M1184035>.
14. Gao T, Kovalsky S, Boyer D, Daubechies I. Gaussian process landmarking for three-dimensional geometric morphometrics. *SIAM J Math Data Sci*. 2019;1(1):237–267. Available from: <https://epubs.siam.org/doi/abs/10.1137/18M1203481>.



- 476 15. Miller E. Fruit flies and moduli: interactions between biology and mathematics. *Notices of the*  
477 *AMS*. 2015;62(10):1178–1184.
- 478 16. Bendich P, Marron JS, Miller E, Pieloch A, Skwerer S. Persistent homology analysis of brain  
479 artery trees. *Ann Appl Stat*. 2016 03;10(1):198–218. Available from: [https://doi.org/10.1214/](https://doi.org/10.1214/15-AOAS886)  
480 [15-AOAS886](https://doi.org/10.1214/15-AOAS886).
- 481 17. Sellke T, Bayarri MJ, Berger JO. Calibration of p-values for testing precise null hypotheses. *Am*  
482 *Stat*. 2001;55(1):62–71.
- 483 18. Neal RM. Monte Carlo implementation of Gaussian process models for Bayesian regression and-  
484 Monte Carlo implementation of Gaussian process models for Bayesian regression and classification.  
485 Dept. of Statistics, University of Toronto; 1997. 9702.
- 486 19. Neal RM. Regression and classification using Gaussian process priors. *Bayesian Anal*. 1998;6:475.
- 487 20. Williams CKI, Barber D. Bayesian classification with Gaussian processes. *IEEE Trans Pattern Anal*  
488 *Mach Intell*. 1998;20(12):1342–1351. Available from: [https://ieeexplore.ieee.org/document/](https://ieeexplore.ieee.org/document/735807/)  
489 [735807/](https://ieeexplore.ieee.org/document/735807/).
- 490 21. Rasmussen CE, Williams CKI. Gaussian processes for machine learning. Cambridge, MA: MIT  
491 Press; 2006.
- 492 22. Nickisch H, Rasmussen CE. Approximations for binary Gaussian process classification. *J Mach*  
493 *Learn Res*. 2008;9(10):2035–2078.
- 494 23. Zhang Z, Dai G, Jordan MI. Bayesian generalized kernel mixed models. *J Mach Learn Res*.  
495 2011;12:111–139.
- 496 24. Heckerman D, Gurdasani D, Kadie C, Pomilla C, Carstensen T, Martin H, et al. Linear mixed  
497 model for heritability estimation that explicitly addresses environmental variation. *Proc Natl*  
498 *Acad Sci U S A*. 2016;113(27):7377–7382. Available from: [http://www.pnas.org/content/113/](http://www.pnas.org/content/113/27/7377.abstract)  
499 [27/7377.abstract](http://www.pnas.org/content/113/27/7377.abstract).
- 500 25. Swain PS, Stevenson K, Leary A, Montano-Gutierrez LF, Clark IBN, Vogel J, et al. Inferring time  
501 derivatives including cell growth rates using Gaussian processes. *Nat Comm*. 2016;7(12):13766.  
502 Available from: <https://doi.org/10.1038/ncomms13766>.
- 503 26. Cheng L, Ramchandran S, Vatanen T, Lietzén N, Lahesmaa R, Vehtari A, et al. An additive  
504 Gaussian process regression model for interpretable non-parametric analysis of longitudinal data.  
505 *Nat Comm*. 2019;10(1):1798. Available from: <https://doi.org/10.1038/s41467-019-09785-8>.
- 506 27. McDonald KR, Broderick WF, Huettel SA, Pearson JM. Bayesian nonparametric models char-  
507 acterize instantaneous strategies in a competitive dynamic game. *Nat Comm*. 2019;10(1):1808.  
508 Available from: <https://doi.org/10.1038/s41467-019-09789-4>.
- 509 28. Rodriguez-Nieva JF, Scheurer MS. Identifying topological order through unsupervised machine  
510 learning. *Nat Phys*. 2019; Available from: <https://doi.org/10.1038/s41567-019-0512-x>.
- 511 29. Schölkopf B, Herbrich R, Smola AJ. A generalized representer theorem. In: Proceedings of the  
512 14th Annual Conference on Computational Learning Theory and and 5th European Conference on  
513 Computational Learning Theory. London, UK, UK: Springer-Verlag; 2001. p. 416–426. Available  
514 from: <http://dl.acm.org/citation.cfm?id=648300.755324>.

- 515 30. Pillai NS, Wu Q, Liang F, Mukherjee S, Wolpert R. Characterizing the function space for Bayesian  
516 kernel models. *J Mach Learn Res.* 2007;8:1769–1797.
- 517 31. Jiang Y, Reif JC. Modeling epistasis in genomic selection. *Genetics.* 2015;201:759–768.
- 518 32. Chaudhuri A, Kakde D, Sadek C, Gonzalez L, Kong S. The mean and median criteria for kernel  
519 bandwidth selection for support vector data description. *Data Mining Workshops (ICDMW), 2017*  
520 *IEEE International Conference on.* 2017;p. 842–849. Available from: [https://ieeexplore.ieee.](https://ieeexplore.ieee.org/abstract/document/8215749/)  
521 [org/abstract/document/8215749/](https://ieeexplore.ieee.org/abstract/document/8215749/).
- 522 33. Singleton KR, Crawford L, Tsui E, Manchester HE, Maertens O, Liu X, et al. Melanoma thera-  
523 peutic strategies that select against resistance by exploiting MYC-driven evolutionary convergence.  
524 *Cell Rep.* 2017;21(10):2796–2812.
- 525 34. Crawford L, Wood KC, Zhou X, Mukherjee S. Bayesian approximate kernel regression with variable  
526 selection. *J Am Stat Assoc.* 2018;113(524):1710–1721. Available from: [https://doi.org/10.](https://doi.org/10.1080/01621459.2017.1361830)  
527 [1080/01621459.2017.1361830](https://doi.org/10.1080/01621459.2017.1361830).
- 528 35. Crawford L, Flaxman SR, Runcie DE, West M. Predictor variable prioritization in nonlinear  
529 models: a genetic association case study. *Ann Appl Stat.* 2019;13(2):958–989. Available from:  
530 <https://projecteuclid.org/euclid.aoas/1560758434>.
- 531 36. Fasy BT, Micka S, Millman DL, Schenfisch A, Williams L. Challenges in reconstructing shapes  
532 from Euler characteristic curves. *arXiv.* 2018;p. 1811.11337.
- 533 37. Oudot S, Solomon E. Inverse problems in topological persistence. *arXiv.* 2018;p. 1810.10813.  
534 Available from: <https://arxiv.org/abs/1810.10813>.
- 535 38. Li F, Zhang T, Wang Q, Gonzalez MZ, Maresh EL, Coan JA. Spatial Bayesian variable selection  
536 and grouping for high-dimensional scalar-on-image regression. *Ann Appl Stat.* 2015;9(2):687–713.  
537 Available from: <https://projecteuclid.org/443/euclid.aoas/1437397107>.
- 538 39. Crawford L, Zeng P, Mukherjee S, Zhou X. Detecting epistasis with the marginal epistasis test in  
539 genetic mapping studies of quantitative traits. *PLoS Genet.* 2017;13(7):e1006869–. Available from:  
540 <https://doi.org/10.1371/journal.pgen.1006869>.
- 541 40. Zhu X, Stephens M. Large-scale genome-wide enrichment analyses identify new trait-associated  
542 genes and pathways across 31 human phenotypes. *Nat Comm.* 2018;9(1):4361.
- 543 41. Lipman Y. Collection of Lemuridae teeth; 2011. Available from: [http://www.wisdom.weizmann.](http://www.wisdom.weizmann.ac.il/~ylipman/CPsurfcomp/)  
544 [ac.il/~ylipman/CPsurfcomp/](http://www.wisdom.weizmann.ac.il/~ylipman/CPsurfcomp/).
- 545 42. Sela M, Aflalo Y, Kimmel R. Computational caricaturization of surfaces. *Comput Vis Image*  
546 *Underst.* 2015;141:1–17. Available from: <https://doi.org/10.1016/j.cviu.2015.05.013>.
- 547 43. Gao T. Hypoelliptic diffusion maps and their applications in automated geometric morphometrics.  
548 Duke University; 2015.
- 549 44. Gao T. The diffusion geometry of fibre bundles: horizontal diffusion maps. *arXiv.* 2016;p.  
550 1602.02330.
- 551 45. St Clair EM, Boyer DM. Lower molar shape and size in prosimian and platyrrhine primates. *Am*  
552 *J Phys Anthropol.* 2016;161(2):237–258.
- 553 46. Guatelli-Steinberg D. Primate dentition: an introduction to the teeth of non-human primates. *Am*  
554 *J Phys Anthropol.* 2003;121(2):189–189. Available from: <https://doi.org/10.1002/ajpa.10194>.

- 555 47. Pozzi L, Hodgson JA, Burella AS, Raaumb RL, Disotell TR. Primate phylogenetic relationships and  
556 divergence dates inferred from complete mitochondrial genomes. *Mol Phylogenet Evol.* 2014;75:165–  
557 183.
- 558 48. Cover T, Hart P. Nearest neighbor pattern classification. *IEEE Trans Inf Theor.* 2006;13(1):21–27.  
559 Available from: <https://doi.org/10.1109/TIT.1967.1053964>.
- 560 49. Graven A. The phylogenetic regression. *Philos Trans R Soc Lond B Biol Sci.* 1989;326(1233):87–99.
- 561 50. Henderson CRCR, of Guelph U. Applications of linear models in animal breeding. Guelph, Ont. :  
562 University of Guelph; 1984. Includes index.
- 563 51. Kang HM, Zaitlen NA, Wade CM, Kirby A, Heckerman D, Daly MJ, et al. Efficient control of  
564 population structure in model organism association mapping. *Genetics.* 2008;178(3):1709–1723.  
565 Available from: <http://www.genetics.org/content/178/3/1709.abstract>.
- 566 52. Kang HM, Sul JH, Service SK, Zaitlen NA, Kong Sy, Freimer NB, et al. Variance component model  
567 to account for sample structure in genome-wide association studies. *Nat Genet.* 2010;42(4):348–354.  
568 Available from: <http://dx.doi.org/10.1038/ng.548>.
- 569 53. Zhou X, Stephens M. Genome-wide efficient mixed-model analysis for association studies. *Nat*  
570 *Genet.* 2012;44(7):821–825.
- 571 54. Belongie S. Rodrigues' rotation formula. From MathWorld—A Wolfram Web Resource, created by  
572 Eric W Weisstein <http://mathworld.wolfram.com/RodriguesRotationFormula.html>. 1999;.
- 573 55. Crompton RH, Savage R, Spears IR. The mechanics of food reduction in *Tarsius bancanus*. Hard-  
574 object feeder, soft-object feeder or both? *Folia Primatol (Basel).* 1998;69(Suppl 1):41–59.
